# Supplementary material
Source: publisher site journal article supplement (https://www.dovepress.com/article/159276)
Supplement: Supplementary file 1 [file get_supplementary_file.php]

# Long-term follow-up on health-related quality of life in major depressive disorder: A 2-year European cohort study

Delphine Saragoussi, Michael Cronquist Christensen, Lene Hammer-Helmich, Benoît Rive, Maëlys Touya, Josep Maria Haro

## SUPPLEMENTARY DATA

### Appendix 1

**Patient characteristics included in univariate analyses at baseline:** country at baseline (France, Germany, Spain, Sweden, UK); age at baseline (18–34, 35–54, 55–65 years); sex at baseline (male/female); educational level at baseline (no degree or diploma/elementary school, high school, non-university degree, university degree); switch of antidepressant at baseline (yes/no); patients' first depressive episode (yes/no); time since beginning of this depressive episode (<1 week, 1–2 weeks, 2–4 weeks, 4–8 weeks, >8 weeks); at least one anxiety symptom/disorder at baseline (yes/no); at least one other concomitant mental disorder at baseline (yes/no); at least one other chronic medical condition at baseline (yes/no); chronic pain or fibromyalgia at baseline (yes/no); chronic fatigue at baseline (yes/no); sleep disorders at baseline (yes/no); suicide attempt before baseline (yes/no); hospitalization for depression over the past 12 weeks before baseline (yes/no); sick leave within the past 12 months before baseline (yes/no); CGI-S score at baseline (1–3, 4, 5–7); PHQ-9 total score at baseline (0–4, 5–9, 10–14, 15–19, 20–27); and PDQ-5 total score at baseline (0–1<sup>st</sup> quartile, 1<sup>st</sup> quartile–median, median–3<sup>rd</sup> quartile, 3<sup>rd</sup> quartile–20).

**Patient characteristics included in univariate analyses at Month 2, Month 6/Month 12, and Month 18/Month 24:** country at baseline (France, Germany, Spain, Sweden, UK); age at baseline (18–34, 35–54, 55–65 years); sex at baseline (male/female); educational level at baseline (no degree or diploma/elementary school, high school, non-university degree, university degree); at least one other concomitant mental disorder at baseline (yes/no); chronic pain or fibromyalgia at baseline (yes/no); suicide attempt before baseline or between

baseline and Month 2 (yes/no); hospitalization for depression between baseline and Month 2 (yes/no); sick leave within the past 12 months before baseline, at baseline, or between baseline and Month 2 (yes/no); treatment line at Month 2 (1, 2,  $\geq 3$ ); antidepressant treatment stopped between baseline and Month 2 (yes/no); CGI-S score at Month 2 (1–3, 4, 5–7); PHQ-9 total score at Month 2 (0–4, 5–9, 10–14, 15–19, 20–27); and PDQ-5 total score at Month 2 (0–1<sup>st</sup> quartile, 1<sup>st</sup> quartile–median, median–3<sup>rd</sup> quartile, 3<sup>rd</sup> quartile–20).

**Table S1.** Summary of patient characteristics at baseline

| <b>Patient characteristic</b>                               | <b>Analyzable population<br/>(N=1159)</b> |
|-------------------------------------------------------------|-------------------------------------------|
| <b><i>Sociodemographics</i></b>                             |                                           |
| Country (n)                                                 |                                           |
| France                                                      | 339                                       |
| Spain                                                       | 270                                       |
| UK                                                          | 341                                       |
| Sweden                                                      | 45                                        |
| Germany                                                     | 164                                       |
| Age, mean $\pm$ SD (years)                                  | 44.3 $\pm$ 12.0                           |
| Female (%)                                                  | 73.2                                      |
| Marital status (%)                                          |                                           |
| Single                                                      | 21.6                                      |
| Married/couple                                              | 58.5                                      |
| Divorced/separated                                          | 16.7                                      |
| Widowed                                                     | 3.2                                       |
| Education (%)                                               |                                           |
| No degree or diploma                                        | 4.5                                       |
| Elementary school                                           | 24.4                                      |
| High school                                                 | 36.9                                      |
| Non-university degree                                       | 14.0                                      |
| University degree                                           | 20.2                                      |
| Work status (%)                                             |                                           |
| Paid employment or self-employed                            | 66.8                                      |
| Unemployed                                                  | 17.8                                      |
| <b><i>Characteristics of current depressive episode</i></b> |                                           |
| Treating physician (% of patient group)                     |                                           |
| General practitioner                                        | 83.6                                      |
| Psychiatrist                                                | 16.4                                      |
| Duration of episode (%) <sup>a</sup>                        |                                           |
| <1 week                                                     | 1.6                                       |
| 1–2 weeks                                                   | 5.9                                       |
| 2–4 weeks                                                   | 21.3                                      |
| 4–8 weeks                                                   | 19.8                                      |
| >8 weeks                                                    | 51.4                                      |
| Treatment <sup>b</sup>                                      |                                           |
| Initiating antidepressant therapy (%)                       | 78.7                                      |
| Switching antidepressant therapy (%)                        | 21.3                                      |
| Significant symptoms of anxiety (%) <sup>c</sup>            | 62.6                                      |
| Anxiety disorders (%) <sup>d</sup>                          | 45.5                                      |

| Patient characteristic                                             | Analyzable population<br>(N=1159) |
|--------------------------------------------------------------------|-----------------------------------|
| Questionnaire scores, mean ± SD                                    |                                   |
| SF-12 <sup>e</sup>                                                 |                                   |
| PCS                                                                | 45.2±12.1                         |
| MCS                                                                | 26.5±9.2                          |
| EQ-5D utility score <sup>f</sup>                                   | 0.5±0.3                           |
| PHQ-9 <sup>g</sup>                                                 | 17.6±5.3                          |
| CGI-S <sup>h</sup>                                                 | 4.2±1.0                           |
| PDQ-5 <sup>i</sup>                                                 | 11.4±4.6                          |
| <b>Other current illnesses</b>                                     |                                   |
| Mental-health disorders other than depression (%)                  |                                   |
| Alcohol abuse or dependence                                        | 2.7                               |
| Other abuse disorders                                              | 1.3                               |
| Somatoform disorders                                               | 7.9                               |
| Eating disorders (anorexia, bulimia)                               | 8.1                               |
| Other                                                              | 0.6                               |
| Functional syndromes (%)                                           |                                   |
| Chronic pain                                                       | 16.7                              |
| Chronic fatigue                                                    | 16.1                              |
| Fibromyalgia                                                       | 6.8                               |
| Premenstrual syndrome                                              | 3.5                               |
| Sleep disorders                                                    | 28.2                              |
| Other                                                              | 2.8                               |
| <b>Previous depressive episodes</b>                                |                                   |
| History of depression (%)                                          |                                   |
| Previous episode <sup>j</sup>                                      | 56.6                              |
| Episode within previous 12 months if previous episode <sup>k</sup> | 25.5                              |
| Antidepressant treatment if previous episode <sup>l</sup>          | 80.9                              |
| Previous hospitalization for depression <sup>k</sup>               | 8.9                               |
| Remission of previous episode <sup>k</sup>                         | 83.2                              |
| Previous suicide attempt <sup>k</sup>                              | 13.1                              |

<sup>a</sup>Physicians' response. <sup>b</sup>N=1157; switching/initiating status unknown for two patients. <sup>c</sup>The percentage refers to patients "probably" or "definitely" presenting clinically significant symptoms of anxiety according to physician; total N=1158. <sup>d</sup>The percentage refers to patients "probably" or "definitely" meeting DSM-IV criteria for one or more of the anxiety disorders according to physician; N=1120. <sup>e</sup>N=912. <sup>f</sup>UK study population only; N=276. <sup>g</sup>N=940. <sup>h</sup>N=1155. <sup>i</sup>N=770. <sup>j</sup>N=1157. <sup>k</sup>N=655. <sup>l</sup>N=654.

**Abbreviations:** CGI-S, Clinical Global Impression–Severity of illness scale; DSM-IV, Diagnostic and Statistical Manual of Mental Disorders (4th Edition); EQ-5D, EuroQol Five Dimensions questionnaire; MCS, mental component summary; PCS, physical component summary; PDQ-5, 5-item Perceived Deficit Questionnaire; PHQ-9, 9-item Patient Health Questionnaire; SD, standard deviation; SF-12, 12-item Short-Form Health Survey.

**Table S2.** Results of the univariate analyses of patient characteristics associated with SF-12 MCS and PCS scores at baseline, Month 2, and Month 6/Month 12. Data shown are coefficients ( $\pm$  standard error). Coefficients show the change in the respective score between the specified levels for each characteristic. Factors with  $P < 0.2$  in the univariate ANOVA were retained in the multivariate ANCOVA (shown in Table 1). A long dash indicates that an association with the characteristic listed was not assessed for this time point; a short dash (-) indicates the reference category.

| Patient characteristic            | Baseline <sup>a</sup> |                  | Month 2 <sup>a</sup> |                  | Month 6/Month 12 <sup>a</sup> |                  |
|-----------------------------------|-----------------------|------------------|----------------------|------------------|-------------------------------|------------------|
|                                   | SF-12 MCS score       | SF-12 PCS score  | SF-12 MCS score      | SF-12 PCS score  | SF-12 MCS score               | SF-12 PCS score  |
| <b>Baseline sociodemographics</b> |                       |                  |                      |                  |                               |                  |
| Country                           | $P < 0.001$           | $P < 0.001$      | $P < 0.001$          | $P < 0.001$      | $P = 0.030$                   | $P < 0.001$      |
| France                            | $-2.76 \pm 0.95$      | $1.13 \pm 1.25$  | $0.44 \pm 1.13$      | $2.11 \pm 1.23$  | $1.35 \pm 1.11$               | $3.32 \pm 1.09$  |
| Spain                             | $0.87 \pm 0.99$       | $-1.67 \pm 1.30$ | $2.72 \pm 1.21$      | $-0.82 \pm 1.32$ | $1.64 \pm 1.17$               | $-0.47 \pm 1.15$ |
| UK                                | $-6.10 \pm 0.96$      | $7.85 \pm 1.25$  | $-2.54 \pm 1.12$     | $6.84 \pm 1.21$  | $-0.57 \pm 1.13$              | $6.66 \pm 1.11$  |
| Sweden                            | $-2.48 \pm 1.62$      | $3.99 \pm 2.11$  | $-3.02 \pm 1.97$     | $3.71 \pm 2.14$  | $-3.19 \pm 2.06$              | $2.95 \pm 2.02$  |
| Germany                           | -                     | -                | -                    | -                | -                             | -                |
| Age (years)                       | $P < 0.001$           | $P < 0.001$      | $P < 0.001$          | $P < 0.001$      | $P = 0.016$                   | $P < 0.001$      |
| 18–34                             | $-5.11 \pm 0.87$      | $7.36 \pm 1.14$  | $-3.57 \pm 1.04$     | $6.70 \pm 1.13$  | $-2.94 \pm 1.06$              | $7.07 \pm 1.04$  |
| 35–54                             | $-1.50 \pm 0.73$      | $4.77 \pm 0.96$  | $-0.78 \pm 0.86$     | $3.83 \pm 0.94$  | $-0.71 \pm 0.85$              | $4.48 \pm 0.84$  |
| 55–65                             | -                     | -                | -                    | -                | -                             | -                |
| Sex; male vs female               | $P = 0.639$           | $P = 0.002$      | $P = 0.832$          | $P = 0.336$      | $P = 0.490$                   | $P = 0.298$      |
|                                   | $-0.32 \pm 0.69$      | $2.72 \pm 0.90$  | $-0.17 \pm 0.81$     | $0.87 \pm 0.90$  | $0.57 \pm 0.82$               | $0.86 \pm 0.83$  |
| Educational level                 | $P < 0.001$           | $P < 0.001$      | $P < 0.001$          | $P < 0.001$      | $P = 0.471$                   | $P < 0.001$      |
| Elementary school                 | $3.43 \pm 0.86$       | $-8.60 \pm 1.10$ | $1.62 \pm 1.01$      | $-8.27 \pm 1.08$ | $0.44 \pm 1.01$               | $-7.68 \pm 0.98$ |
| High school                       | $0.34 \pm 0.82$       | $-2.09 \pm 1.04$ | $-1.41 \pm 0.96$     | $-2.01 \pm 1.03$ | $-0.57 \pm 0.97$              | $-2.32 \pm 0.94$ |
| Non-university degree             | $1.49 \pm 1.05$       | $-0.41 \pm 1.34$ | $2.53 \pm 1.23$      | $-0.82 \pm 1.32$ | $1.07 \pm 1.23$               | $-0.16 \pm 1.19$ |
| University degree                 | -                     | -                | -                    | -                | -                             | -                |

| Patient characteristic                             | Baseline <sup>a</sup>         |                               | Month 2 <sup>a</sup>          |                               | Month 6/Month 12 <sup>a</sup> |                               |
|----------------------------------------------------|-------------------------------|-------------------------------|-------------------------------|-------------------------------|-------------------------------|-------------------------------|
|                                                    | SF-12 MCS score               | SF-12 PCS score               | SF-12 MCS score               | SF-12 PCS score               | SF-12 MCS score               | SF-12 PCS score               |
| <b>Clinical characteristics</b>                    |                               |                               |                               |                               |                               |                               |
| CGI-S score <sup>b</sup>                           | <i>P</i> <0.001               |
| 1–3                                                | 3.30±0.88                     | 4.75±1.15                     | 5.84±1.16                     | 6.39±1.28                     | 7.30±1.11                     | 6.02±1.16                     |
| 4                                                  | 1.19±0.66                     | 5.07±0.86                     | 1.74±1.21                     | 3.94±1.33                     | 2.46±1.16                     | 3.19±1.21                     |
| 5–7                                                | —                             | —                             | —                             | —                             | —                             | —                             |
| PHQ-9 score <sup>b</sup>                           | <i>P</i> <0.001               |
| 0–4                                                | 22.05±2.88                    | 6.10±4.22                     | 21.54±1.29                    | 15.12±1.62                    | 16.06±1.52                    | 13.52±1.59                    |
| 5–9                                                | 12.74±1.10                    | 8.80±1.61                     | 12.30±0.99                    | 11.57±1.24                    | 11.87±1.16                    | 10.73±1.22                    |
| 10–14                                              | 8.48±0.76                     | 4.30±1.11                     | 7.57±0.97                     | 8.64±1.21                     | 7.79±1.14                     | 7.69±1.19                     |
| 15–19                                              | 4.38±0.64                     | 2.82±0.94                     | 2.93±1.02                     | 5.10±1.28                     | 3.05±1.22                     | 5.58±1.28                     |
| 20–27                                              | —                             | —                             | —                             | —                             | —                             | —                             |
| PDQ-5 score <sup>b</sup>                           | <i>P</i> <0.001               |
| 0–7                                                | 11.49±0.89                    | 5.23±1.31                     | 13.84±0.94                    | 7.25±1.19                     | 11.62±1.09                    | 6.10±1.20                     |
| 8–11                                               | 7.12±0.84                     | 3.57±1.23                     | 7.64±0.94                     | 6.45±1.19                     | 6.83±1.06                     | 5.16±1.16                     |
| 12–14                                              | 4.36±0.84                     | 1.14±1.24                     | 5.11±0.95                     | 3.75±1.19                     | 4.91±1.08                     | 3.63±1.19                     |
| 15–20                                              | —                             | —                             | —                             | —                             | —                             | —                             |
| Patient's first depressive episode; yes vs no      | <i>P</i> =0.990<br>−0.01±0.61 | <i>P</i> =0.203<br>1.02±0.80  | —                             | —                             | —                             | —                             |
| Time since the start of this depressive episode    | <i>P</i> =0.073               | <i>P</i> =0.075               | —                             | —                             | —                             | —                             |
| <1 week                                            | 3.98±2.40                     | 5.41±3.16                     |                               |                               |                               |                               |
| 1–2 weeks                                          | 2.37±1.29                     | −1.92±1.70                    |                               |                               |                               |                               |
| 2–4 weeks                                          | 1.61±0.79                     | 1.18±1.03                     |                               |                               |                               |                               |
| 4–8 weeks                                          | 1.01±0.80                     | −1.34±1.06                    |                               |                               |                               |                               |
| >8 weeks                                           | —                             | —                             |                               |                               |                               |                               |
| Suicide attempt <sup>c</sup> ; yes vs no           | <i>P</i> =0.003<br>−3.60±1.22 | <i>P</i> =0.045<br>−3.24±1.61 | <i>P</i> =0.003<br>−4.05±1.35 | <i>P</i> =0.291<br>−1.59±1.50 | <i>P</i> <0.001<br>−5.38±1.32 | <i>P</i> =0.062<br>−2.53±1.35 |
| At least one anxiety symptom/disorder at baseline; | <i>P</i> =0.077<br>1.13±0.63  | <i>P</i> <0.001<br>−3.73±0.83 | —                             | —                             | —                             | —                             |

| Patient characteristic                                                   | Baseline <sup>a</sup>         |                                | Month 2 <sup>a</sup>          |                               | Month 6/Month 12 <sup>a</sup> |                               |
|--------------------------------------------------------------------------|-------------------------------|--------------------------------|-------------------------------|-------------------------------|-------------------------------|-------------------------------|
|                                                                          | SF-12 MCS score               | SF-12 PCS score                | SF-12 MCS score               | SF-12 PCS score               | SF-12 MCS score               | SF-12 PCS score               |
| yes vs no                                                                |                               |                                |                               |                               |                               |                               |
| At least one other concomitant mental disorder at baseline; yes vs no    | <i>P</i> =0.051<br>1.64±0.84  | <i>P</i> <0.001<br>-4.84±1.09  | <i>P</i> =0.473<br>0.71±0.99  | <i>P</i> <0.001<br>-3.73±1.09 | <i>P</i> =0.139<br>-1.41±0.95 | <i>P</i> <0.001<br>-3.63±0.96 |
| At least one other chronic medical condition at baseline; yes vs no      | <i>P</i> =0.118<br>1.08±0.69  | <i>P</i> <0.001<br>-5.60±0.89  | —                             | —                             | —                             | —                             |
| Chronic pain or fibromyalgia at baseline; yes vs no                      | <i>P</i> <0.001<br>4.32±0.75  | <i>P</i> <0.001<br>-10.29±0.95 | <i>P</i> =0.174<br>1.21±0.89  | <i>P</i> <0.001<br>-9.11±0.93 | <i>P</i> =0.030<br>-1.90±0.87 | <i>P</i> <0.001<br>-9.05±0.83 |
| Chronic fatigue at baseline; yes vs no                                   | <i>P</i> =0.004<br>2.41±0.85  | <i>P</i> <0.001<br>-5.46±1.10  | —                             | —                             | —                             | —                             |
| Sleep disorders at baseline; yes vs no                                   | <i>P</i> =0.672<br>0.29±0.68  | <i>P</i> =0.004<br>-2.58±0.89  | —                             | —                             | —                             | —                             |
| Hospitalization for depression <sup>d</sup> ; yes vs no                  | <i>P</i> =0.399<br>1.57±1.86  | <i>P</i> =0.006<br>-6.74±2.44  | <i>P</i> =0.480<br>-1.77±2.50 | <i>P</i> =0.012<br>-6.84±2.73 | <i>P</i> =0.558<br>-1.43±2.45 | <i>P</i> =0.119<br>-3.92±2.51 |
| Sick leave <sup>e</sup> ; yes vs no                                      | <i>P</i> =0.267<br>-0.73±0.66 | <i>P</i> =0.007<br>-2.34±0.86  | <i>P</i> =0.010<br>-1.87±0.72 | <i>P</i> =0.067<br>-1.47±0.80 | <i>P</i> =0.301<br>-0.75±0.72 | <i>P</i> =0.259<br>-0.83±0.73 |
| <b>Treatment characteristics</b>                                         |                               |                                |                               |                               |                               |                               |
| Switch of antidepressant at baseline; yes vs no                          | <i>P</i> =0.598<br>0.39±0.75  | <i>P</i> <0.001<br>-5.77±0.97  | —                             | —                             | —                             | —                             |
| Treatment line at Month 2                                                | —                             | —                              | <i>P</i> =0.002<br>0.82±1.76  | <i>P</i> <0.001<br>6.16±1.93  | <i>P</i> <0.001<br>3.92±1.63  | <i>P</i> <0.001<br>6.17±1.65  |
| 1                                                                        |                               |                                |                               |                               |                               |                               |
| 2                                                                        |                               |                                | -2.14±1.86                    | 1.57±2.03                     | -0.26±1.73                    | 1.57±1.75                     |
| ≥3                                                                       |                               |                                | —                             | —                             | —                             | —                             |
| Antidepressant treatment stopped between baseline and Month 2; yes vs no | —                             | —                              | <i>P</i> =0.518<br>0.97±1.49  | <i>P</i> =0.162<br>2.29±1.63  | <i>P</i> =0.796<br>0.37±1.43  | <i>P</i> =0.034<br>3.07±1.44  |

<sup>a</sup>Number of patients with an SF-12 assessment: Baseline, N=912; Month 2, N=807; Month 6, N=738; Month 12, N=702.

<sup>b</sup>Baseline CGI-S, PHQ-9 and PDQ-5 scores used in analysis of HRQoL outcomes at baseline; Month 2 CGI-S, PHQ-9 and PDQ-5 scores used in analysis of HRQoL outcomes at Month 2, Month 6/Month 12, and Month 18/ Month 24.

<sup>c</sup>Before baseline for HRQoL outcomes at baseline; before baseline or between baseline and Month 2 for HRQoL outcomes at Month 2, Month 6/ Month 12, and Month 18/ Month 24.

<sup>d</sup>Within 12 weeks before baseline for HRQoL outcomes at baseline; between baseline and Month 2 for HRQoL outcomes at Month 2, Month 6/ Month 12, and Month 18/ Month 24.

<sup>e</sup>Within 12 months before baseline for HRQoL outcomes at baseline; within 12 months before baseline or at baseline or between baseline and Month 2 for HRQoL outcomes at Month 2 and Month 6/Month 12.

**Abbreviations:** CGI-S, Clinical Global Impression–Severity of illness scale; HRQoL, health-related quality of life; MCS, mental component summary; PCS, physical component summary; PDQ-5, 5-item Perceived Deficit Questionnaire; PHQ-9, 9-item Patient Health Questionnaire; SF-12, 12-item Short-Form Health Survey

**Table S3.** Results of the univariate analyses of patient characteristics associated with EQ-5D utility index at baseline, Month 2, Month 6/Month 12, and Month 18/Month 24 (UK population only). Data shown are coefficients ( $\pm$  standard error). Coefficients show the change in the respective score between the specified levels for each characteristic. Factors with  $P < 0.2$  in the univariate ANOVA were retained in the multivariate ANCOVA (shown in Table 2). A long dash indicates that an association with the characteristic listed was not assessed for this time point; a short dash (-) indicates the reference category.

| Patient characteristic                          | EQ-5D utility index <sup>a</sup> |                  |                      |                       |
|-------------------------------------------------|----------------------------------|------------------|----------------------|-----------------------|
|                                                 | Baseline                         | Month 2          | Month 6/<br>Month 12 | Month 18/<br>Month 24 |
| <b>Baseline sociodemographics</b>               |                                  |                  |                      |                       |
| Age (years)                                     | $P=0.029$                        | $P=0.083$        | $P=0.079$            | $P=0.464$             |
| 18–34                                           | 0.05 $\pm$ 0.05                  | -0.07 $\pm$ 0.05 | 0.05 $\pm$ 0.05      | 0.05 $\pm$ 0.06       |
| 35–54                                           | 0.12 $\pm$ 0.05                  | 0.02 $\pm$ 0.04  | 0.10 $\pm$ 0.05      | 0.06 $\pm$ 0.05       |
| 55–65                                           | —                                | —                | —                    | —                     |
| Sex; male vs female                             | $P=0.183$                        | $P=0.891$        | $P=0.334$            | $P=0.438$             |
|                                                 | -0.05 $\pm$ 0.04                 | -0.00 $\pm$ 0.04 | -0.04 $\pm$ 0.04     | 0.03 $\pm$ 0.04       |
| Educational level                               | $P=0.376$                        | $P=0.499$        | $P=0.027$            | $P=0.005$             |
| Elementary school                               | -0.01 $\pm$ 0.07                 | -0.10 $\pm$ 0.07 | -0.17 $\pm$ 0.07     | -0.26 $\pm$ 0.07      |
| High school                                     | 0.01 $\pm$ 0.04                  | -0.04 $\pm$ 0.04 | -0.08 $\pm$ 0.04     | -0.11 $\pm$ 0.05      |
| Non-university degree                           | 0.00 $\pm$ 0.06                  | -0.02 $\pm$ 0.06 | 0.02 $\pm$ 0.06      | -0.07 $\pm$ 0.07      |
| University degree                               | —                                | —                | —                    | —                     |
| <b>Clinical characteristics</b>                 |                                  |                  |                      |                       |
| CGI-S score <sup>b</sup>                        | $P < 0.001$                      | $P < 0.001$      | $P = 0.003$          | $P = 0.008$           |
| 1–3                                             | 0.03 $\pm$ 0.06                  | 0.41 $\pm$ 0.09  | 0.24 $\pm$ 0.10      | 0.27 $\pm$ 0.10       |
| 4                                               | 0.02 $\pm$ 0.05                  | 0.27 $\pm$ 0.09  | 0.14 $\pm$ 0.10      | 0.18 $\pm$ 0.10       |
| 5–7                                             | —                                | —                | —                    | —                     |
| PHQ-9 score <sup>b</sup>                        | $P < 0.001$                      | $P < 0.001$      | $P < 0.001$          | $P < 0.001$           |
| 0–4                                             | NA                               | 0.54 $\pm$ 0.06  | 0.45 $\pm$ 0.07      | 0.34 $\pm$ 0.08       |
| 5–9                                             | 0.32 $\pm$ 0.08                  | 0.47 $\pm$ 0.04  | 0.39 $\pm$ 0.05      | 0.28 $\pm$ 0.06       |
| 10–14                                           | 0.22 $\pm$ 0.06                  | 0.39 $\pm$ 0.04  | 0.34 $\pm$ 0.05      | 0.25 $\pm$ 0.06       |
| 15–19                                           | 0.16 $\pm$ 0.04                  | 0.28 $\pm$ 0.04  | 0.22 $\pm$ 0.05      | 0.10 $\pm$ 0.06       |
| 20–27                                           | —                                | —                | —                    | —                     |
| PDQ-5 score <sup>b</sup>                        | $P < 0.001$                      | $P < 0.001$      | $P < 0.001$          | $P = 0.005$           |
| 0–7                                             | 0.29 $\pm$ 0.06                  | 0.24 $\pm$ 0.05  | 0.17 $\pm$ 0.06      | 0.13 $\pm$ 0.06       |
| 8–11                                            | 0.21 $\pm$ 0.04                  | 0.28 $\pm$ 0.04  | 0.20 $\pm$ 0.05      | 0.19 $\pm$ 0.05       |
| 12–14                                           | 0.21 $\pm$ 0.04                  | 0.16 $\pm$ 0.04  | 0.12 $\pm$ 0.04      | 0.08 $\pm$ 0.05       |
| 15–20                                           | —                                | —                | —                    | —                     |
| Patient's first depressive episode; yes vs no   | $P=0.470$                        | —                | —                    | —                     |
|                                                 | 0.03 $\pm$ 0.04                  |                  |                      |                       |
| Time since the start of this depressive episode | $P=0.505$                        | —                | —                    | —                     |
| <1 week                                         | 0.20 $\pm$ 0.17                  |                  |                      |                       |
| 1–2 weeks                                       | -0.06 $\pm$ 0.08                 |                  |                      |                       |

| Patient characteristic                                                         | EQ-5D utility index <sup>a</sup> |                               |                               |                               |
|--------------------------------------------------------------------------------|----------------------------------|-------------------------------|-------------------------------|-------------------------------|
|                                                                                | Baseline                         | Month 2                       | Month 6/<br>Month 12          | Month 18/<br>Month 24         |
| 2–4 weeks                                                                      | 0.02±0.06                        |                               |                               |                               |
| 4–8 weeks                                                                      | 0.05±0.05                        |                               |                               |                               |
| >8 weeks                                                                       | —                                |                               |                               |                               |
| Suicide attempt <sup>c</sup> ;<br>yes vs no                                    | <i>P</i> <0.001<br>−0.19±0.06    | <i>P</i> =0.002<br>−0.17±0.05 | <i>P</i> <0.001<br>−0.24±0.05 | <i>P</i> <0.001<br>−0.21±0.06 |
| At least one anxiety<br>symptom/disorder at<br>baseline; yes vs no             | <i>P</i> <0.001<br>−0.12±0.03    | —                             | —                             | —                             |
| At least one other<br>concomitant mental<br>disorder at baseline; yes<br>vs no | <i>P</i> =0.087<br>−0.15±0.09    | <i>P</i> =0.093<br>−0.13±0.08 | <i>P</i> =0.905<br>−0.01±0.11 | <i>P</i> =0.384<br>0.09±0.10  |
| At least one other chronic<br>medical condition at<br>baseline; yes vs no      | <i>P</i> =0.131<br>−0.07±0.04    | —                             | —                             | —                             |
| Chronic pain or<br>fibromyalgia at baseline;<br>yes vs no                      | <i>P</i> =0.004<br>−0.17±0.06    | <i>P</i> <0.001<br>−0.24±0.05 | <i>P</i> <0.001<br>−0.20±0.05 | <i>P</i> <0.001<br>−0.26±0.06 |
| Chronic fatigue at<br>baseline; yes vs no                                      | <i>P</i> =0.465<br>−0.11±0.14    | —                             | —                             | —                             |
| Sleep disorders at<br>baseline; yes vs no                                      | <i>P</i> =0.156<br>0.12±0.08     | —                             | —                             | —                             |
| Hospitalization for<br>depression <sup>d</sup> ; yes vs no                     | <i>P</i> =0.698<br>0.04±0.10     | <i>P</i> =0.309<br>−0.20±0.19 | <i>P</i> <0.001<br>−0.85±0.25 | <i>P</i> <0.001<br>−0.85±0.25 |
| Sick leave <sup>e</sup> ; yes vs no                                            | <i>P</i> =0.014<br>−0.09±0.03    | <i>P</i> =0.001<br>−0.11±0.03 | <i>P</i> =0.059<br>−0.07±0.03 | <i>P</i> =0.264<br>−0.04±0.04 |
| <b>Treatment characteristics</b>                                               |                                  |                               |                               |                               |
| Switch of antidepressant at<br>baseline; yes vs no                             | <i>P</i> =0.044<br>−0.09±0.05    | —                             | —                             | —                             |
| Treatment line at Month 2                                                      | —                                | <i>P</i> <0.001               | <i>P</i> <0.001               | <i>P</i> =0.003               |
| 1                                                                              |                                  | 0.16±0.09                     | −0.07±0.10                    | −0.01±0.11                    |
| 2                                                                              |                                  | −0.04±0.10                    | −0.24±0.10                    | −0.18±0.11                    |
| ≥3                                                                             |                                  | —                             | —                             | —                             |
| Antidepressant treatment<br>stopped between baseline<br>and Month 2; yes vs no | —                                | <i>P</i> =0.554<br>0.04±0.07  | <i>P</i> =0.187<br>0.08±0.06  | <i>P</i> =0.714<br>−0.03±0.07 |

<sup>a</sup>Number of patients with an EQ-5D assessment: Baseline, N=276; Month 2, N=261; Month 6, N=216; Month 12, N=196; Month 18, N=161; Month 24, N=160

<sup>b</sup>Baseline CGI-S, PHQ-9 and PDQ-5 scores used in analysis of HRQoL outcomes at baseline; Month 2 CGI-S, PHQ-9 and PDQ-5 scores used in analysis of HRQoL outcomes at Month 2, Month 6/ Month 12, and Month 18/ Month 24.

<sup>c</sup>Before baseline for HRQoL outcomes at baseline; before baseline or between baseline and Month 2 for HRQoL outcomes at Month 2, Month 6/Month 12, and Month 18/Month 24.

<sup>d</sup>Within 12 weeks before baseline for HRQoL outcomes at baseline; between baseline and Month 2 for HRQoL outcomes at Month 2, Month 6/ Month 12, and Month 18/ Month 24.

<sup>e</sup>Within 12 months before baseline for HRQoL outcomes at baseline; within 12 months before baseline or at baseline or between baseline and Month 2 for HRQoL outcomes at Month 2 and Month 6/Month 12.

**Abbreviations:** CGI-S, Clinical Global Impression–Severity of illness scale; EQ-5D, EuroQol Five Dimensions questionnaire; HRQoL, health-related quality of life; NA, not available; PDQ-5, 5-item Perceived Deficit Questionnaire; PHQ-9, 9-item Patient Health Questionnaire
